1 **Acute effects of passive listening to Indian musical scale on blood pressure and heart rate**  
2 **variability among healthy young individuals – a randomized controlled trial**

3 **List of authors and affiliation:**

4 Kirthana Kunikullaya Ubrangala<sup>1</sup>,

5 Vijayadas<sup>1</sup>,

6 Radhika Kunnavi<sup>2</sup>,

7 Jaisri Goturu<sup>3</sup>,

8 Vadagenahalli S Prakash<sup>4</sup>,

9 Nandagudi Srinivasa Murthy<sup>5</sup>

10

11

12 <sup>1</sup>Department of Physiology, M S Ramaiah Medical College, MSR Nagar, MSRIT Post,  
13 Bangalore, Karnataka, India – 560054

14 <sup>2</sup>Department of Community Medicine, M S Ramaiah Medical College, MSR Nagar, MSRIT  
15 Post, Bangalore, Karnataka, India – 560054

16 <sup>3</sup>Department of Physiology, International Medical School, MSR Nagar, MSRIT Post,  
17 Bangalore, Karnataka, India – 560054

18 <sup>4</sup>Department of Cardiology, M S Ramaiah Memorial Hospitals, MSR Nagar, MSRIT Post,  
19 Bangalore, Karnataka, India – 560054

20 <sup>5</sup>Department of research and patents, Gokula Education Foundation, MSR Nagar, MSRIT  
21 Post, Bangalore, Karnataka, India – 560054

22

23

24

25

26

27 **Corresponding author:**

28 Dr. Kirthana Kunikullaya U.

29 Assistant Professor,

30 Department of Physiology,

31 M S Ramaiah Medical College,

32 MSR Nagar, MSRIT Post,

33 Mathikere, Bangalore,

34 Karnataka – 560054

35 Ph: +91-97423 34950

36 Email: [kirthana.rguhs@gmail.com](mailto:kirthana.rguhs@gmail.com)

37 **Clinical Trials identifier:** NCT03790462

38

39

40

41

42

43

44

45

46

47

48

49

50

51 **Abstract**

52 **Background:**

53 Listening to music is entertaining but also has different health benefits. Music medicine  
54 involves passive listening to music, while music therapy involves active music making. Indian  
55 music is broadly classified into Hindustani and Carnatic music, each having their own system  
56 of musical scales (*ragas*). Scientific studies of Indian music as an intervention is meagre.  
57 Current study determines the effect of passive listening to one melodic scale of Indian music  
58 on cardiovascular electrophysiological parameters.

59 **Methods:** After informed consent, healthy individuals aged 18 – 30 years, of either gender  
60 were recruited and randomly divided into 2 groups (n=34 each). Group A was exposed to  
61 passive listening to the music intervention [Hindustani melodic scale elaboration (*Bhimpalas*  
62 *raga alaap*)], while group B received no intervention except for few natural sounds (played  
63 once in every 2 minutes). Blood pressure (BP, systolic – SBP; diastolic – DBP) and  
64 Electrocardiogram in lead II were recorded with each condition lasting for 10 minutes (pre,  
65 during, post). Heart rate variability (HRV) analysis was done. Data was analysed using SPSS  
66 20.0 version and  $p < 0.05$  was considered significant.

67 **Results:**

68 Passive listening to the musical scale employed had a unique effect. In group A, the  
69 SBP did not change during the intervention but increased insignificantly after the intervention  
70 was stopped ( $P=0.054$ ). The DBP increased in both the groups during intervention and was  
71 significant among subjects in group A ( $P=0.009$ ), with an increase of 1.676 mm Hg ( $P=0.012$ )  
72 from pre-during and 1.824 mm Hg ( $P=0.026$ ) from pre-post intervention. On HRV analysis  
73 mean NN interval increased and HR reduced in both the groups, but was significant only in  
74 group B ( $P=0.041$  and  $0.025$  respectively). In group A, most of HRV parameters reduced  
75 during music intervention, and tended to return towards baseline after intervention, but was  
76 statistically significant for Total Power ( $P=0.031$ ) and Low Frequency ( $P=0.013$ ) change; while  
77 in group B a consistent significant rise in parasympathetic indicators [SDNN, RMSSD, Total  
78 power and HF ( $\text{ms}^2$ )] over 30 minutes was observed.

79 **Conclusion:**

80 Unique cardiovascular effects were recorded on passive listening to a particular Indian  
81 music melodic scale, *raga Bhimpalas*, wherein, a mild arousal response, was observed. This

82 could be due to attention being paid to the melodic scale as it was an unfamiliar tune or due to  
83 certain notes of this melodic scale, that particularly caused an arousal or excitation response.  
84 In contrast, the control group had only relaxation response. Exploring electrophysiological  
85 effects of different genres, melodic scales and its properties after familiarizing with the music  
86 may be illustrative.

87 **Keywords:** Indian Music, melodic scale, Blood pressure, ECG, heart rate variability

88

89

90

91

92

93

94

95

96

97

98

99

100

101

102

103

104

105

106

107 **Main Manuscript**

108 **Acute effects of passive listening to Indian musical scale on blood pressure and heart**  
109 **rate variability among healthy young individuals – a randomized controlled trial**

110 **Introduction**

111 Music is an aesthetic stimulus that has unique properties such as pitch, tempo, rhythm,  
112 scale, dynamic contrasts etc. The property, that when kept constant or varied, can specifically  
113 produce health benefits remains to be elucidated. Recent research recognized that specific  
114 acoustic factors within the musical signal induces a change in the processing of human  
115 cognitive and perceptual systems, to generate different bodily responses (1,2).

116 Indian music is broadly classified into Carnatic (South Indian) and Hindustani (North  
117 Indian) music, each with its own unique style. Music in India is said to have originated from  
118 Vedic chant tradition and traditional Persian music, as per ancient Indian music texts (3).  
119 *Ragas*, or musical or melodic scale, are permutations and combinations of various notes, in a  
120 specific order, in order to produce a melody. *Raga* may also be defined as a series of tones with  
121 specific melodic motifs that when improvised results in expression of certain emotions and  
122 creates a specified aesthetic experience (4,5).

123 In music theory, an interval is the difference in pitch between two sounds. An octave is  
124 the interval between one musical pitch and another pitch, that is double its frequency. The basic  
125 set of tones and relationships between them, that are used in *ragas* are derived are the 12-tone  
126 octave divisions / chromatic scale (6). Each interval is a tone defined by the ratio of its  
127 fundamental frequency to the tonic (*Sa*). *Swara* / note implies a note in the successive steps of  
128 the octave (7). With just 3 notes/ *swara* during Vedic times, the number increased to 5 and later  
129 7 notes (*saptaswara* – represented as *Sa, Ri, Ga, Ma, Pa, Dha* and *Ni*, equivalent to *Do, Re,*  
130 *Mi, Fa, So, La, Ti* of western music), which is now considered ideal to produce a melodic scale  
131 / *raga* (6,8). Each melodic scale is organized as *Aarohana* (ascending sequence of notes) and  
132 *Avarohana* (descending sequence), is further improvised, within the framework of the scale, in  
133 vocal or instrumental performances, presenting the various aspects of the scale (e.g.,  
134 sustainance of notes, elaboration, timing, ending notes, repeated notes etc.). The ‘major’  
135 intervals are the *shuddh swaras* or the natural notes namely, second, third, sixth, and seventh  
136 while the ‘minor’ intervals are the *komal swaras* (flat) positions of the same tones. Indian music  
137 improvisation has unique set of rules that is pre-determined but yet creative, and *alaap (vistar),*  
138 *jor, swarakalpana, taan, tanam, neraval* and so on, all form different parts of this

139 improvisation. *Alaap* is quasi-creative improvisation, seen in both Carnatic and Hindustani  
140 music, where, note by note is elaborated, presenting the prominent phrases of the scale, usually  
141 beginning in a slow tempo, with progress to medium and faster tempos, but not bound by any  
142 rhythmic cycle (9–11). It is beyond the scope of this article to describe all types of  
143 improvisations.

144 Music not only has benefits that are psychological but physiological as well. It can  
145 regulate stress mechanism, sleep wake cycle, improve cognitive skills, beneficially effect the  
146 blood pressure (BP), heart rate (HR), respiration rate (RR), body temperature, and biochemical  
147 parameters as well as sensitivity to pain (12–17). Music literature as well as past studies have  
148 shown that specific *ragas* elicit distinct emotions / *rasas* (18–22). As a result of increased  
149 interest and research in this field, musical auditory stimulation is now proposed as a non-  
150 pharmacological intervention or as a complementary therapy (23–25) .

151 One of the initial works exploring the cardiovascular effects of music, was in 1918, by  
152 Hyde *et al*, who found a decrease in systolic blood pressure (SBP) and diastolic blood pressure  
153 (DBP) when minor tones were used, whereas, the stirring notes of Toreador’s song increased  
154 the SBP and HR (26). Cardiorespiratory parameters were modified on repeated rhythmic  
155 recitation of a prayer, poetry or yoga mantra (27,28). Listening to sedative music (slow tempo,  
156 legato phrasing, and minimal dynamic contrasts) was shown to reduce HR and BP. BP was  
157 shown to be proportional to the crescendo present in music, whereas music with uniform  
158 emphasis reduced the BP (16). A study has shown that music was as effective as  
159 benzodiazepines in reducing BP (29).

160 Several studies reported that under various conditions music decreases sympathetic  
161 nervous system (SNS) and increases parasympathetic nervous system (PNS) activity as  
162 measured by HR and heart rate variability (HRV), indicating physiological relaxation (30–34).  
163 However, no difference in HR or HRV was observed by a few investigators (35,36), an increase  
164 was reported by some (32,37). A few works showed that music decreased Low frequency /  
165 High frequency (LF/HF) ratio (34), while a few others showed an increase in LF/HF (32,37).  
166 When music was intervened with randomly inserted 2 minute pauses it was observed that  
167 passive listening to music increases BP, HR and LF/HF in proportion to tempo and perhaps to  
168 the complexity of the rhythm. It was found that silence (pauses), that followed the music,  
169 induced more parasympathetic stimulation. One Indian track (*raga Maru Behag* played on  
170 Sitar) used by the authors, which had a tempo of 55 beats/min, however, induced a significant  
171 large fall in HR (32). People with different tastes in music respond differently, and those who  
172 are not involved in the music have no response (38). One study, where use of *Rabindra sangeet*

173 improved HRV, the authors hypothesized that the effect differed from person to person (39).  
174 A recent systematic review also concluded that music does have positive effects on autonomic  
175 nervous system (12).

176 We thus observe that there is varying literature available on the effects of music on the  
177 cardiovascular parameters and the mechanisms behind it. However, there are very few studies  
178 that have used Indian music scientifically as an intervention for health benefits. In India, music  
179 is predominantly used as entertainment. Despite ample vedic literature available on the  
180 beneficial effects of melodic scales / *ragas* on human mind and body, scientific evidence for  
181 the same is extremely meagre. In our previous work we showed that BP reduced significantly  
182 after listening to Indian music among prehypertensives. All subjects were given a musical piece  
183 composed on *raga 'bhimpalas'* (*raga* that is said to normalize BP(40)) to be heard daily, for  
184 15 minutes a day, for at least 5 days a week, for 3 months. Here, 24 hour ambulatory BP and  
185 HRV were recorded once on recruitment and followed up after 3 months. On retrospection into  
186 our methodology, the acute effect of passive listening to the *raga* on BP or HRV was not  
187 explored, nor the effect of other *ragas* listed in *Gandharva veda* (that could normalize the BP)  
188 were scientifically evaluated, for their electrophysiological effects (15,41).

189 The hypothesis of the present study was that, an Indian musical scale, the *Hindustani*  
190 *raga, Bhimpalas*, would reduce BP and increase parasympathetic activity analysed through  
191 HRV, during a passive listening task, that would return to baseline after intervention, among  
192 young healthy individuals.

### 193 **Methodology**

194 A double blinded, prospective, randomized controlled trial was conducted with an  
195 experimental study design, with a total sample of 68, randomized into 2 groups (n=34 subjects  
196 in each group). Group A was exposed to passive listening to the music intervention [Hindustani  
197 melodic scale elaboration (*alaap*)], while group B received no intervention except for few  
198 natural sounds (played for 10 seconds once in every 2 minutes to avoid sleeping). The study  
199 protocol was approved by the institutional scientific committee on human research and ethical  
200 review board.

201

202

203

204

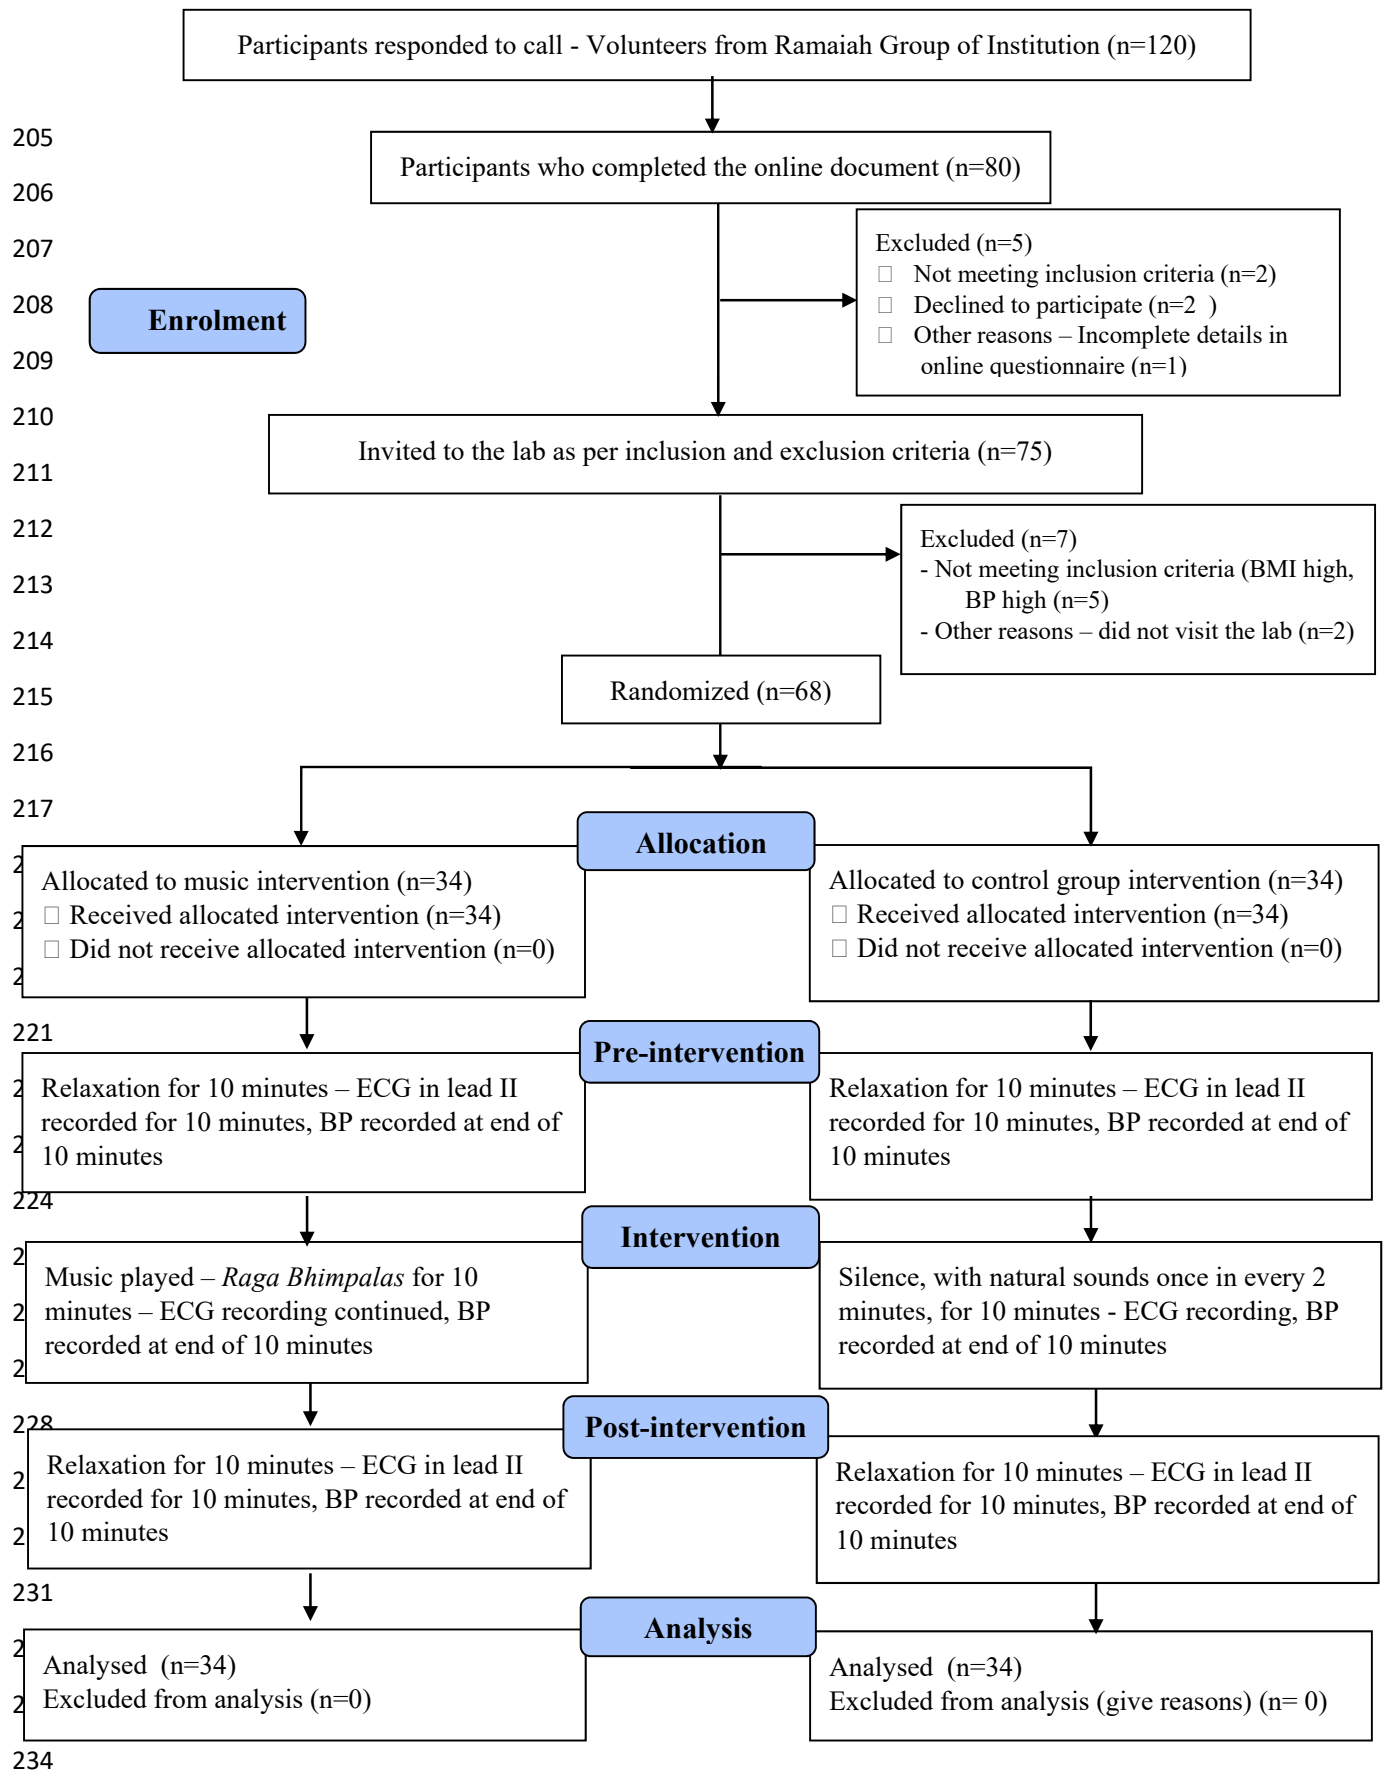

235 **Figure 1: Consort diagram of participant recruitment, random allocation, data collection and**  
 236 **follow up.**



### 237 **Basis for sample size**

238 The sample size was calculated (using nMaster 2.0 sample size software, Department of  
239 Biostatistics, CMC, Vellore) based on a study conducted by Okada *et al* (34) it was found that  
240 RMSSD (root mean square standard deviation of NN intervals on ECG) was 17.4 (7.2) ms and  
241 24.1 (15.5) ms before and after music therapy. With an effect size of 0.59 and power of 90%  
242 and confidence interval of 95%, the minimum sample size required for the present study was  
243 estimated to be 32, in each group.

### 244 **Recruitment of subjects for the study**

245 Ramaiah group of institutions comprise of people from medical, dental, pharmacy,  
246 physiotherapy, engineering etc. backgrounds. Healthy subjects aged 18 – 30 years were invited  
247 to participate in the study via advertisements in notice boards of various institutions, social  
248 media posts and posters. Participants who responded to the call were sent an online  
249 questionnaire via google forms, as explained further. About 100-120 responded to the call, of  
250 which 80 completed the google form. Inclusion criteria were healthy subjects, aged 18-30  
251 years, of either gender, non-smokers and alcoholics. Exclusion criteria was any medical  
252 disorder (cardiovascular, renal, respiratory, endocrine, hearing problem, psychiatric disorders,  
253 stroke, epilepsy), pregnancy, body mass index (BMI)>30 kg/m<sup>2</sup>; intake of drugs which are  
254 known to affect the BP or autonomic status of the individual, other impairments that would  
255 prevent the subject from performing few experimental procedures. The healthy cardiovascular  
256 system of the volunteers was defined by measuring BP, that confirmed their non-hypertensive  
257 state and by measuring baseline HR that confirmed their non-tachycardiac state.

### 258 **Baseline demographic data collection**

259 A pre-tested, pre-designed web-based questionnaire (Google forms) was implemented, so  
260 that it is convenient for the subjects enrolled to enter their data easily. This questionnaire  
261 contained details such as subject's name, gender, socio-demographic details, education  
262 background, drug history, present or past history of non-communicable diseases if any and  
263 family history of non-communicable disorders, smoking and alcohol history. A few questions  
264 inquiring the subjects' preference to any type of music, previous experience with music  
265 (instrumental or vocal) was also included. Following the collection of data online, the subjects  
266 were invited, for further data collection, to the lab.

267 Out of 80 subjects who answered the online questionnaire, 75 subjects reported to the lab.  
268 The subjects were interviewed and all the information was collected after establishing rapport  
269 with them. After overnight fasting, they were asked to take a light breakfast and abstain from  
270 exhaustive exercise, for the past 24 hrs. They were asked to abstain from tea, coffee about 2  
271 hours prior to the recording. A general health check-up was done for all subjects. The BMI  
272 was calculated and BP in sitting position was measured twice after five minutes' rest  
273 (Sphygmomanometer) in between, and was noted (42). Only normotensives were included as  
274 per inclusion criteria. Recruited subjects (n=68) were explained about the study protocol, and  
275 co-operation expected from them and informed consent was obtained to participate in the study.  
276 They were informed about their rights to withdraw their participation from the study.

### 277 **Randomization**

278 All subjects were randomized into 2 groups using simple randomization technique. The  
279 random numbers were computer generated using MS Excel (2 sets of 34 each). The random  
280 number indicating intervention or control was kept in an opaque and sealed envelope and the  
281 serial number of the subjects were written on the top of the envelope. The envelope was opened  
282 by the research assistant after the baseline assessment of each participant had been completed  
283 and assigned the participants randomly to both the arms, into intervention and control  
284 categories. All the investigators who did the outcome assessments were blinded to the  
285 interventions.

### 286 **Baseline (Pre) and Post intervention readings**

287 All the recordings were carried out between 08:00 am and 10.00 am in an isolated  
288 examination room at a stable temperature between 20 and 22°C, in a noise free atmosphere. It  
289 was ensured no one entered the lab once recordings began. The subjects were asked to relax in  
290 a bed for about 10 minutes prior to the tests, with their eyes closed. They were asked to remain  
291 as still as possible to exclude movement induced artefacts, and also refrain from talking, falling  
292 asleep and intentionally altering their respiration during the recording. We also instructed the  
293 subjects to breathe at a rate of 6 breaths per minute, throughout the procedure that was  
294 monitored on the computer software. Subjects were carefully monitored to ensure there were  
295 no significant respiratory or postural changes during the session.

296 During the first ten minutes, BP cuff was tied to the left arm of the subjects and one  
297 reading was taken for the subject to know the feel of automatic cuff inflation and deflation.  
298 Recording of BP, was done using digital BP monitor as a normal sphygmomanometer  
299 recording would not only disturb the subject during the intervention but also delay the

300 recordings and eliminate the effect the intervention. A standardized digital BP monitor was  
301 used (Omron HEM-7130L, Europe), the reliability of which has been established (43). Electro-  
302 cardiogram (ECG) was recorded in Lead II (sample rate of 1000 Hz) for ten minutes, as it is  
303 twice the minimum window required for HRV analysis. The recording of the data began in the  
304 Power lab 15 T Lab chart hardware & software (AD instruments).

305 After all the attachments, within the first 10 minutes, baseline ECG recording  
306 commenced. At the end of 10 minutes, baseline digital measurement of BP (systolic, diastolic  
307 BP and pulse rate) was done and recorded as pre-intervention readings. This event was marked  
308 in ECG and the recordings continued. After this music intervention began, and the event was  
309 marked. At the end of 10 minutes of music, without disturbing the subject the BP was recorded.  
310 ECG monitoring was continued for another 10 minutes and at the end, the event was marked.  
311 Post intervention BP was recorded and the subjects were made to feel comfortable and were  
312 relieved.

### 313 **Intervention**

314 The 2 mp3 recordings were coded as A and B by a person uninvolved in the present  
315 study. We instructed the subjects to listen to this with eyes closed, mind relaxed, for the  
316 duration it was played. The subjects listened to the music through headphones [studies have  
317 previously used headphones, which is considered ideal as per the review (44)], connected to a  
318 laptop, at uniform volume (50%).

### 319 ***Music intervention***

320 For music intervention, the previously standardized melodic scale *Bhimpalas* was used  
321 for the present study (15,41). It contained instrumental (*Bansuri*) music recorded by an eminent  
322 flautist, playing the respective *alaap* in the *raga* (musical scale). The melodic scale / *raga* was  
323 played for 10 mins duration. The subjects in Group A listened to music.

324 *Bhimpalas raga*, belongs to the *Kapi thaat*, is a soft, poignant and passionate *raga* that  
325 evokes a feeling of love and yearning. It is generally classified as a 'late-afternoon' *raga*. In  
326 Carnatic music (South Indian classical music) the *raga* 'Abheri' is the closest counterpart of  
327 this Hindustani *raga* (45). The scale of this *raga* is as follows: *Arohaṇa*: S G<sub>2</sub> M<sub>1</sub> P N<sub>2</sub> S.  
328 *Avarohaṇa*: S N<sub>2</sub> D<sub>2</sub> P M<sub>1</sub> G<sub>2</sub> R<sub>2</sub> S (*shadja*, *shuddha Rishabh*, *komal Gandhar*, *suddha*  
329 *Madhyam*, *pancham*, *shuddha Dhaivath*, *komal Nishadh*). Equivalent notes on western scale  
330 are B<sub>b</sub> C E<sub>b</sub> F G B<sub>b</sub> C as ascent and C B<sub>b</sub> A G F E<sub>b</sub> D C as descent on western scale (46). Thus  
331 the scale is made up of two flat keys and no sharps.

332 **Table 1: Scale of Raga Bhimpalas, the names of the notes in Hindustani music and Western**  
 333 **scale, with their equivalent frequencies, just intonations and 12-TET**

| Svara / Note | Hindustani name | Staff note     | Western scale Interval name | Frequency | Just intonation (Cents) | 12-TET (Cent) |
|--------------|-----------------|----------------|-----------------------------|-----------|-------------------------|---------------|
| Sa           | Shadja          | C              | Perfect unison              | 1         | 0                       | 0             |
| re           | Shuddha rishab  | D              | Major second                | 10/9      | 183                     | 200           |
| ga           | Komal gandhar   | E <sub>b</sub> | Minor third                 | 6/5       | 316                     | 300           |
| Ma           | Shuddha madhyam | F              | Perfect fourth              | 4/3       | 498                     | 500           |
| Pa           | Pancham         | G              | Perfect fifth               | 3/2       | 702                     | 700           |
| Dha          | Shuddha daivat  | A              | Major sixth                 | 5/3       | 884                     | 900           |
| ni           | Komal nishad    | B <sub>b</sub> | Minor seventh               | 9/5       | 1018                    | 1000          |

334 Note: Interval names, abbreviations, frequency ratios, and sizes in cents for just intonation (JI) as well as 12-tone  
 335 equal temperament (12-TET) tunings are shown. The 12 intervals of the Western chromatic scale, comparably  
 336 presented (More about JI and 12-TET in supplementary file).

337

### 338 ***Intervention to the control group***

339 The control group (Group B) did not receive any intervention, but since the complete  
 340 recording lasted for 30 – 40 minutes' duration, it was possible for the subjects to feel sleepy or  
 341 fall asleep. Sleep would cause its own electrophysiological effects, which would alter the  
 342 objective of the present study. Further, silence during the middle 10 minutes would not be an  
 343 ideal to compare, when the other group received music. For these 2 reasons, natural sounds  
 344 (birds chirping and flowing river) was played for 10 seconds duration once in every 2 minutes  
 345 in the mid-10 minutes (intervention phase).

### 346 **BP Analysis**

347 The readings given by the BP monitor were recorded as SBP (in mm Hg), DBP (in mm  
 348 Hg) and HR (in beats per minute). The readings were taken before (end of 10 minutes of  
 349 relaxation – pre-intervention), during (end of 10 minutes of intervention) and after (end of 10  
 350 minutes after the intervention was stopped) intervention.

### 351 **HRV Analysis**

352 Of the whole recording the first 1-2 minutes of each segment of data were excluded in  
 353 case of any transition or adjustment effect. Only series with more than 95% of sinus beats was  
 354 used for analysis. Time domain parameters analysed using fast Fourier transformation (FFT  
 355 size: 1024) were SDNN—the standard deviation of NN intervals, RMSSD—Root square of

356 the mean squared difference of successive NNs, NN50—number of pairs of successive NNs  
357 that differ by more than 50 ms, pNN50—proportion of NN50 divided by total number of NNs,  
358 spectral components such as Very Low Frequency (VLF), Low Frequency (LF) and High  
359 Frequency (HF) components in absolute values of power ( $\text{ms}^2$ ) and in normalized units (nu),  
360 and LF/HF.

361 A region in the channel that contained data without much variation and ectopics was  
362 selected and analysed. A threshold value was set to detect the beats (R waves – R component  
363 of QRS complex) and it was increased to avoid detection of unwanted peaks or decreased to  
364 detect genuine beats that would have been missed. Beats which fall outside of the timing of a  
365 normal sinus rhythm were considered ectopics. Ectopics were excluded as they do not represent  
366 ANS activity and are not believed to contribute to HRV. Inclusion of ectopics during analysis  
367 results in falsely higher representation of HF component of HRV (47,48). Poincare plot, where  
368 RR interval is plotted against the preceding RR interval, in a scatter plot analysis, has been  
369 widely used as a quantitative visual tool for HRV analysis (49–51). After referring the Poincare  
370 plot (for the best possible ellipse), RR interval Tachogram, a plot of successive RR interval  
371 values against the interval number, and the spectrum for any ectopics and detection of R waves,  
372 a report was generated and results were entered onto an excel sheet and tabulated. Sources of  
373 error were minimized by only having one of the investigator perform the recording of ECG and  
374 analysis of HRV of the subjects. The parameters analysed were pre, during and post intervention  
375 mean NN interval, HR (Average of 10 minutes), SDNN, RMSSD, NN50, pNN50, VLF, LF,  
376 HF ( $\text{ms}^2$ ), LF nu, HF nu and LF/HF.

### 377 **Statistical analysis**

378 Data was analysed using SPSS software version 18.0 (SPSS Inc. Released in 2009.  
379 PASW Statistics for Windows, Version 18.0. Chicago: SPSS Inc.). The continuous variables  
380 were analysed using descriptive statistics using mean and SD. The categorical variables were  
381 analysed using frequency and percentage. The normalcy of the data was checked by applying  
382 the Kolmogorov-Smirnov Test. All the variables namely BP, HR, and HRV were found to  
383 follow the normal distribution.

384 Baseline comparisons between the groups were carried out using students' t-test for  
385 continuous variables and chi-square test for categorical variables. All HRV parameters were  
386 compared between groups and at pre, during and post-intervention using repeated measures of  
387 ANOVA (RM ANOVA) test. Bonferroni multiple comparisons test was used to compare the  
388 pairwise differences. All the baseline parameters were comparable between the groups. Only

389 baseline DBP showed a significant difference between the groups and hence multivariate  
 390 regression analysis and stratified analysis were carried out to adjust for the various covariates.  
 391 Two-tailed P value <0.05 was considered for statistical significance.

## 392 Results

393 A total of 68 subjects were enrolled into the study, with each group consisting of 34  
 394 subjects. The two groups were comparable based on mean age, age distribution and gender.  
 395 There were more subjects in the age group of 19-21 years in both the groups. Groups were  
 396 comparable with respect to BMI with statistically no significant difference (P=0.307).

397 About 30% of individuals out of 68 recruited were musically trained, with about 29.4% in  
 398 group A and 32.4% in group B (P=0.793). Subjects were predominantly trained in Indian music  
 399 (91.7%). Most of the subjects preferred listening to old *Hindi* movie songs.

400 **Table 2: Distribution of subjects under music intervention group (Group A) and control**  
 401 **group (Group B).**

| Variables                                    | Group   | Group A<br>n (%)<br>N=34 | Group B<br>n (%)<br>N=34 | Total<br>n (%)<br>N=68 | P -Value |
|----------------------------------------------|---------|--------------------------|--------------------------|------------------------|----------|
| Age (Years)                                  | <=18    | 7 (20.6)                 | 4 (11.8)                 | 11 (16.2)              | 0.651    |
|                                              | 19-21   | 19 (55.9)                | 19 (55.9)                | 38 (55.9)              |          |
|                                              | 22-24   | 4 (11.8)                 | 4 (11.8)                 | 8 (11.8)               |          |
|                                              | >=25    | 4 (11.8)                 | 7 (20.6)                 | 12 (16.2)              |          |
| Age (years)<br>Mean, SD                      |         | 20.3, 2.60               | 21.0, 2.71               | 20.8, 2.80             | 0.278    |
| Gender                                       | Female  | 16 (47.1)                | 9 (26.5)                 | 25 (36.8)              | 0.078    |
|                                              | Male    | 18 (52.9)                | 25 (73.5)                | 43 (63.2)              |          |
| Mean BMI<br>(kg/m <sup>2</sup> )<br>Mean, SD |         | 23.4, 4.67               | 22.3, 4.02               | 23.0, 4.45             | 0.307    |
| Training in<br>Music                         | No      | 24 (70.6)                | 23 (67.6)                | 47 (69.1)              | 0.793    |
|                                              | Yes     | 10 (29.4)                | 11 (32.4)                | 21 (30.9)              |          |
| Genre of<br>music                            | Indian  | 9 (90.0)                 | 13 (92.9)                | 22 (91.7)              | 0.803    |
|                                              | Western | 1 (10.0)                 | 1 (7.1)                  | 2 (8.3)                |          |

402 **Note:**

- 403 a) N is the number of subjects in each group. N=34, in each group.  
 404 b) Values are represented as Mean, SD (Standard deviation)  
 405 c) Group A (Raga A - Intervention group), Group B (Control)  
 406 d) All the values are in absolute values and in parenthesis are in percentages.  
 407 e) P calculated using Chi square test / Fisher exact test.  
 408 f) P Value of < 0.05 is considered significant.  
 409 g) Mean age, BMI comparison was done using ANOVA  
 410

411 Baseline comparison of the parameters were carried out between the 2 groups, which  
 412 revealed that SBP (P=0.501), HR (P=0.8) and all the parameters of HRV were comparable.  
 413 However, DBP showed statistically significant difference between the groups (P=0.003).

414 **Table 3 : Comparison of absolute values and logarithmic levels of BP (in mm Hg), HR and HRV**  
 415 **in between 2 groups, pre, during and post intervention**

|                                 | Group A (N=34) |              |              |                | Group B (N=34) |              |              |                | P (between groups)** |
|---------------------------------|----------------|--------------|--------------|----------------|----------------|--------------|--------------|----------------|----------------------|
|                                 | Pre            | During       | Post         | P within group | Pre            | During       | Post         | P within group |                      |
| <b>SBP (mm Hg)<sup>a#</sup></b> | 107.6, 12.79   | 107.4, 13.96 | 109.4, 13.20 | 0.054          | 105.7, 9.98    | 105.4, 10.26 | 103.8, 11.43 | 0.22           | 0.259                |
| <b>DBP (mm Hg)<sup>a#</sup></b> | 67.2, 6.10     | 68.9, 7.37   | 69.1, 6.51   | <b>0.009*</b>  | 71.8, 6.09     | 73.0, 6.82   | 72.4, 7.83   | 0.403          | <b>0.010*</b>        |
| <b>HR (bpm)<sup>a#</sup></b>    | 71.91, 8.5     | 71.68, 9.26  | 72.03, 7.01  | 0.937          | 72.59, 12.94   | 72.18, 8.81  | 71.62, 9.64  | 0.74           | 0.903                |
| <b>Mean NN (ms)</b>             | 2.9, 0.04      | 2.9, 0.05    | 2.9, 0.04    | 0.091          | 2.9,0.07       | 2.9,0.07     | 2.9, 0.06    | <b>0.041*</b>  | 0.541                |
| <b>HR (bpm)<sup>a^</sup></b>    | 72.9, 7.09     | 72.1, 7.26   | 71.7, 7.18   | 0.061          | 72.8, 11.29    | 71.1, 10.49  | 71.0, 10.59  | <b>0.025*</b>  | 0.778                |
| <b>SDNN</b>                     | 1.8, 0.17      | 1.7, 0.17    | 1.7, 0.21    | 0.405          | 1.8, 0.18      | 1.8, 0.17    | 1.8, 0.18    | <b>0.004*</b>  | 0.231                |
| <b>RMSSD</b>                    | 1.7, 0.26      | 1.7, 0.26    | 1.7, 0.26    | 0.337          | 1.7, 0.28      | 1.8, 0.24    | 1.8, 0.25    | <b>0.040*</b>  | 0.384                |
| <b>NN50</b>                     | 2.2, 0.57      | 2.2, 0.48    | 2.2, 0.46    | 0.802          | 2.2, 0.58      | 2.2, 0.50    | 2.2, 0.51    | 0.278          | 0.914                |
| <b>pNN50</b>                    | 1.3, 0.52      | 1.3, 0.48    | 1.3, 0.49    | 0.864          | 1.3, 0.62      | 1.3, 0.54    | 1.4, 0.37    | 0.128          | 0.412                |
| <b>TP (ms<sup>2</sup>)</b>      | 3.5, 0.35      | 3.4, 0.34    | 3.5, 0.36    | <b>0.031*</b>  | 3.5, 0.38      | 3.5, 0.35    | 3.6, 0.37    | <b>0.009*</b>  | 0.348                |
| <b>VLF (ms<sup>2</sup>)</b>     | 3.0,0.33       | 2.9,0.31     | 2.9, 0.40    | 0.173          | 2.9, 0.38      | 3.0, 0.29    | 3.0, 0.34    | 0.113          | 0.336                |
| <b>LF (ms<sup>2</sup>)</b>      | 2.8,0.37       | 2.8,0.38     | 2.9,0.37     | <b>0.013*</b>  | 2.9, 0.39      | 3.0, 0.38    | 3.0, 0.35    | <b>0.025*</b>  | 0.084                |
| <b>LF (nu)</b>                  | 1.6, 0.20      | 1.5, 0.25    | 1.6, 0.22    | 0.269          | 1.6, 0.17      | 1.6, 0.19    | 1.6, 0.19    | 0.573          | 0.275                |
| <b>HF (ms<sup>2</sup>)</b>      | 3.0, 0.45      | 3.0, 0.44    | 3.0, 0.46    | 0.555          | 3.0, 0.50      | 3.1, 0.43    | 3.1, 0.46    | <b>0.023*</b>  | 0.527                |
| <b>HF (nu)</b>                  | 1.7, 0.16      | 1.7, 0.17    | 1.7, 0.16    | 0.233          | 1.7, 0.19      | 1.7, 0.16    | 1.7, 0.15    | 0.387          | 0.79                 |
| <b>LF/HF</b>                    | 0.9, 0.32      | 0.9, 0.36    | 1.0, 0.33    | 0.206          | 0.9, 0.31      | 0.9, 0.36    | 1.0, 0.34    | 0.682          | 0.751                |

416 Note:

- 417 a) N is the number of subjects in each group.  
 418 b) <sup>a</sup>absolute level #one-time measurement; <sup>^</sup>Average of continuous monitoring over 10 minutes  
 419 c) BP is given in (mm Hg) and HRV all parameters have been log converted, except HR, which is in beats per  
 420 minute (bpm)  
 421 d) For all HRV parameters, the null hypothesis (H<sub>0</sub>) considered was that mean values is the same at all the time  
 422 points (pre, during and post). The alternative hypothesis is that mean value is significantly different at one  
 423 or more time points.  
 424 e) For absolute values of all HRV parameters refer supplementary file  
 425 f) All the values are in mean, standard deviation (SD) – univariate ANOVA.  
 426 g) P value < 0.05 was considered significant – Levene’s test of equality  
 427 h) \*\*P calculated using RM-ANOVA.

428

429 *Before intervention*

430 All sociodemographic and baseline parameters were comparable between the two groups,  
431 except DBP (P=0.010), which was higher in the control group prior to intervention. However,  
432 on regression analysis of all the variables (age, gender, education, diet, marital status,  
433 involvement in physical activity, mind body relaxation techniques, family history of non-  
434 communicable disorders, training in music, preference to music along with differences in BP  
435 based on conditions), none of the parameters seemed to affect the change in DBP that was  
436 observed.

437 *BP During and after intervention:*

438 The key findings in BP at 20<sup>th</sup> minute (during music) in group A were - SBP was similar to  
439 pre-intervention levels during intervention and increased after intervention (P=0.054). When  
440 the differences amongst the groups were tested, statistically no significant difference was found  
441 (P = 0.259). The DBP increased significantly (P=0.009), by 1.676 mm Hg (P=0.012) during  
442 intervention and by 1.824 mm Hg; (P=0.026) after intervention in comparison to pre-  
443 intervention levels. The HR insignificantly reduced during and increased after intervention  
444 (P=0.937). In control group, SBP reduced during intervention and after intervention (P=0.22),  
445 DBP increased during intervention and later reduced (P=0.403). The HR continued to reduce  
446 throughout the 30 minutes' duration (P=0.74) [Table 3; Figure 2]. Note that the HR measured  
447 using BP apparatus was recorded one time along with BP and was not an average of continuous  
448 monitoring before, during or after intervention.

449 *HRV During and after intervention:*

450 Note that the changes in HRV were the average of 10.1<sup>th</sup> to 20<sup>th</sup> minute of ECG analysis.  
451 For HRV analysis, all parameters except HR were log transformed due to skewness in data  
452 obtained (absolute levels of all HRV parameters and pairwise comparison has been shown in  
453 Supplementary file). ANOVA with repeated measures<sup>1</sup> was used with sphericity assumption.

---

<sup>1</sup> The repeated measures ANOVA tests for whether there are any differences between related population means. The null hypothesis (H<sub>0</sub>) states that the means are equal:

$$H_0: \mu_1 = \mu_2 = \mu_3 = \dots = \mu_k$$

where  $\mu$  = population mean and  $k$  = number of related groups. The alternative hypothesis (H<sub>A</sub>) states that the related population means are not equal (at least one mean is different to another mean):

*H<sub>A</sub>: at least two means are significantly different*



454 Further, two way repeated measures of ANOVA analysis was done to inspect the interaction  
455 between intervention group and time. The results are as follows.

456 In group A, during intervention, the various parasympathetic parameters of HRV  
457 [SDNN, RMSSD, TP, VLF, LF, HF ( $\text{ms}^2$ )] reduced along with HR, but was statistically not  
458 significant. The mean NN interval increased, but not significantly ( $P=0.091$ ). After intervention  
459 mean NN interval continued to increase, HR reduced, while SDNN, RMSSD, TP ( $\text{ms}^2$ ), HF  
460 ( $\text{ms}^2$ ) and LF ( $\text{ms}^2$ ) increased towards pre-intervention levels. The change was significant for  
461 TP ( $\text{ms}^2$ ) (Global HRV) ( $P=0.031$ ) and LF ( $\text{ms}^2$ ) ( $P=0.013$ ). On pairwise comparison LF  $\text{ms}^2$ ,  
462 the change was maximal after intervention compared to during music ( $P=0.005$ ). Though NN50  
463 and pNN50 reduced in group A, after log transformation the change was statistically not  
464 significant.

465 In control group, during and after intervention, sustained and significant increase  
466 ( $P\leq 0.05$ ) in mean NN interval ( $P=0.041$ ), SDNN ( $P=0.004$ ), RMSSD ( $P=0.040$ ), TP ( $\text{ms}^2$ )  
467 ( $P=0.009$ ), LF ( $\text{ms}^2$ ) ( $P=0.025$ ) and HF ( $\text{ms}^2$ ) ( $P=0.023$ ) was observed along with reduced HR  
468 reduced ( $P=0.025$ ). On pairwise comparison, maximum change in Mean NN interval was  
469 observed from pre-intervention to during intervention interval ( $P=0.005$ ). The reduction in HR  
470 was maximum during intervention compared to baseline levels ( $P=0.002$ ). The unit drop in HR  
471 was very less (hardly 1 beat per minute). SDNN change was significant after intervention  
472 compared to baseline ( $P=0.014$ ) and during ( $P=0.024$ ) levels. Total power change was  
473 significant after intervention compared to baseline levels ( $P=0.026$ ). The change in LF ( $\text{ms}^2$ )  
474 was maximal after intervention, compared to during ( $P=0.049$ ) intervention. These changes  
475 observed in HRV parameters in its absolute power were statistically not significant after  
476 normalized unit (nu) conversion.

477

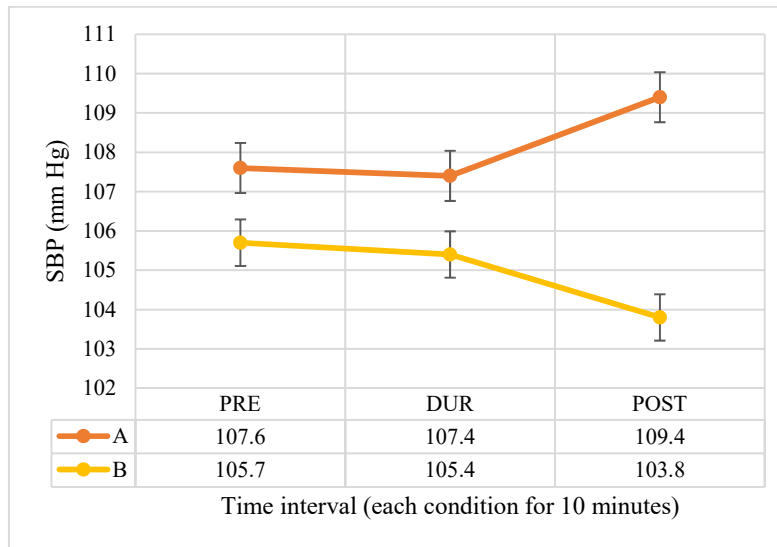

478

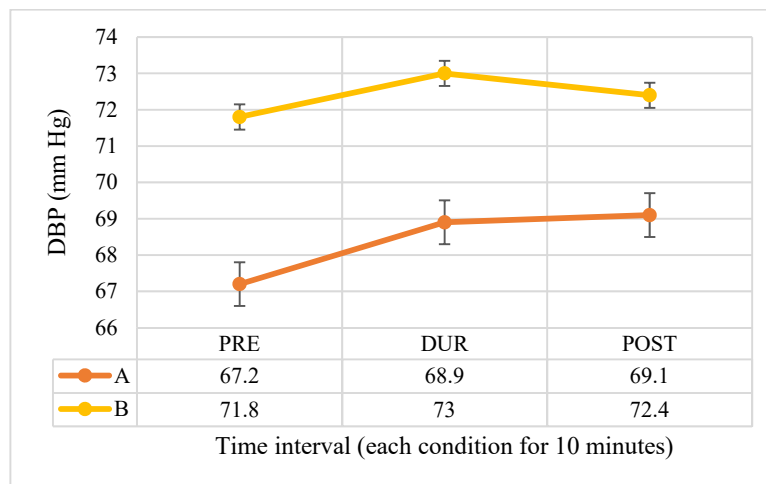

479

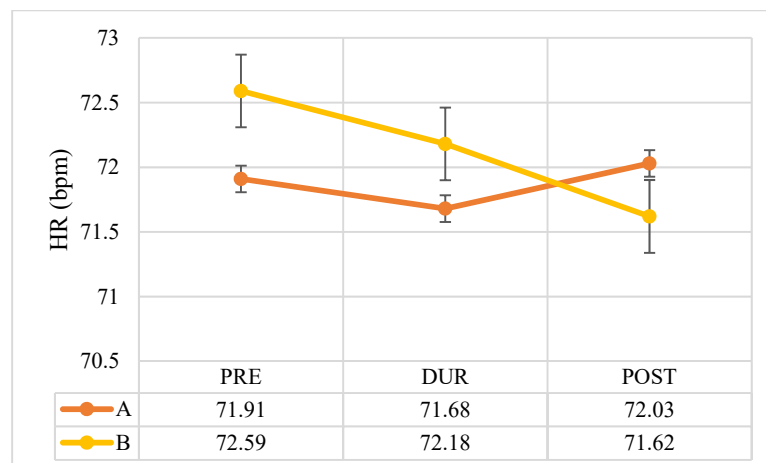

480

481 **Figure 2: Comparison of SBP, DBP (in mmof Hg) and HR (in bpm) between 2 groups (Pre, Dur**  
482 **and Post intervention)**

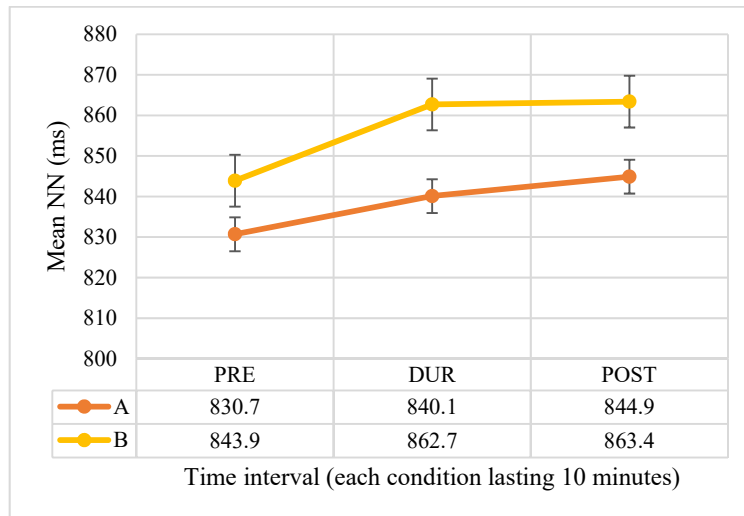

483

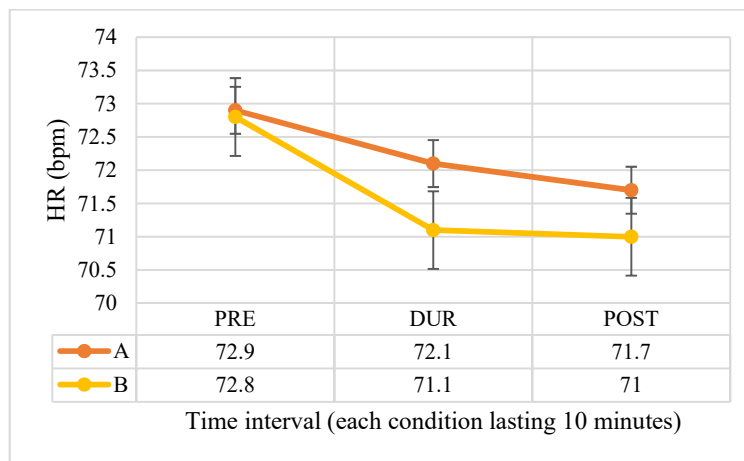

484

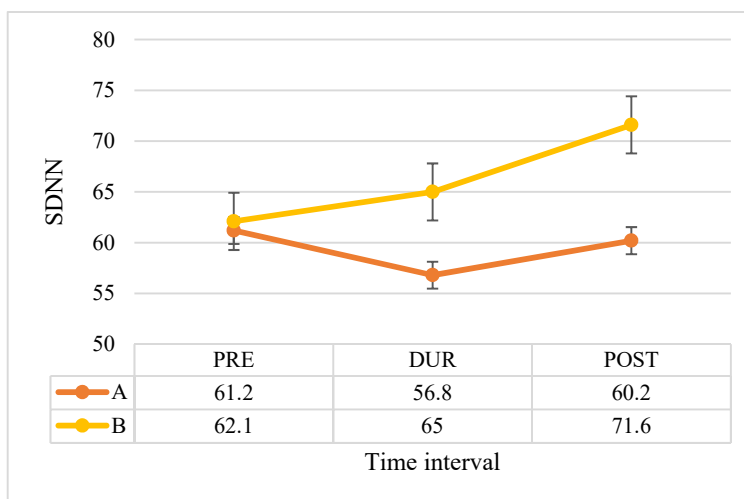

485

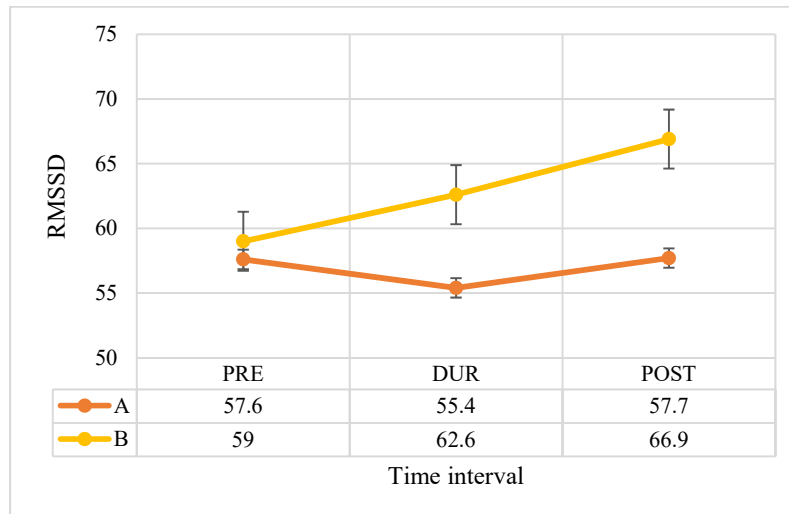

486

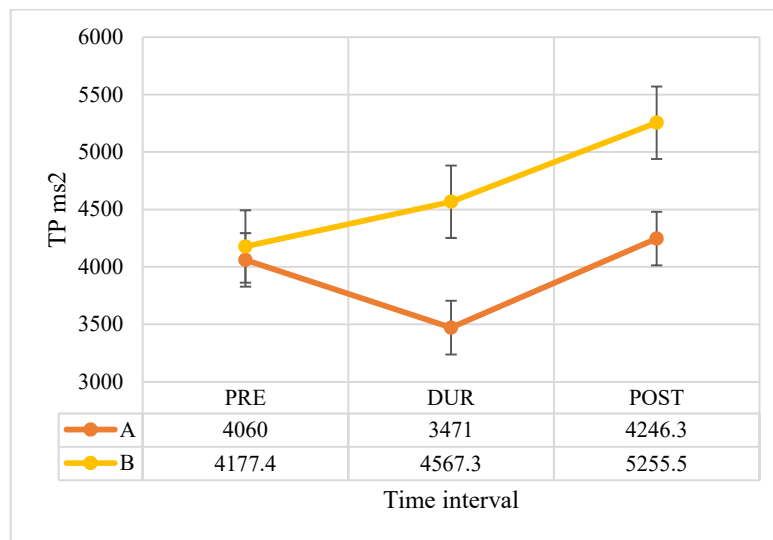

487

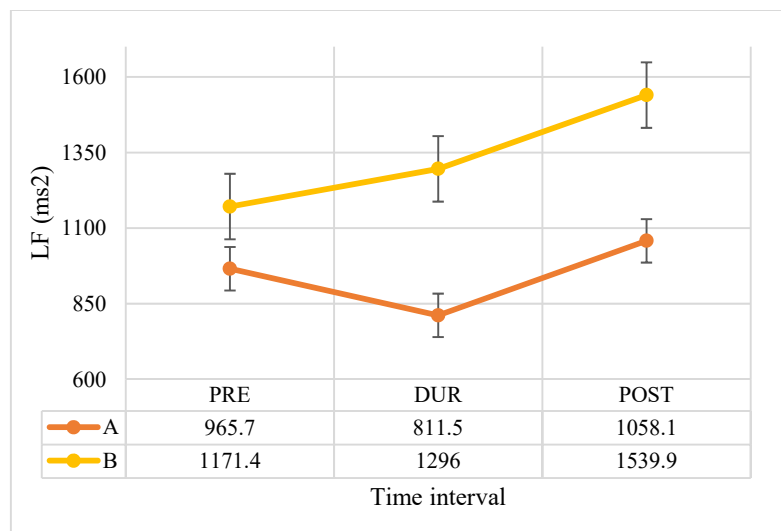

488

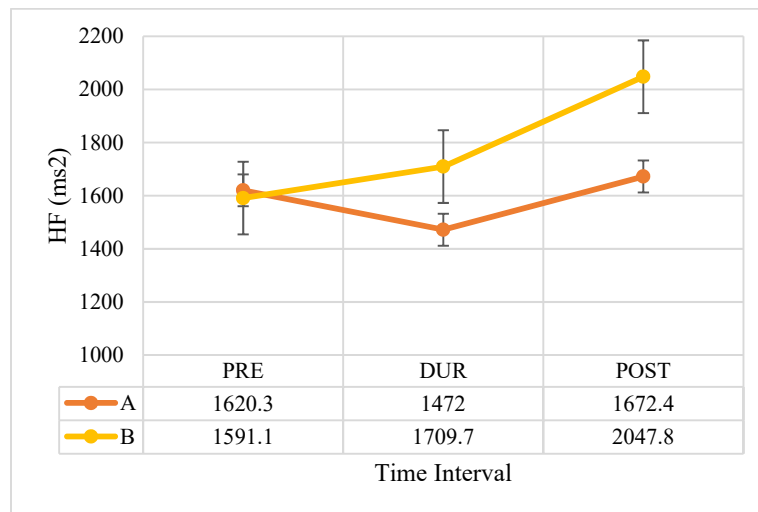

489

490 **Figure 3: Comparison of Absolute values of Mean NN Interval (ms), HR (Lead II ECG,**  
491 **Averaged), SDNN, RMSSD, TP(ms2), LF(ms2) and HF (ms2) between 2 groups (Pre, Dur and**  
492 **Post intervention). Note that the absolute values have been given in data table below each graph.**  
493 **For all absolute values, refer supplementary file.**

#### 494 **Discussion**

495 In this study, to the best of our knowledge, for the first time, an Indian musical scale  
496 (*Hindustani raga*) has been evaluated scientifically for its effect on electrophysiological  
497 parameters such as BP and HRV in young, clinically normal, normotensive individuals.

498 Vedic literature (*sama veda*) and *raga chikitsa* literature specifies about 7 ragas to be  
499 useful in BP control (*Ahir bhairav, Kausi Kanada, Bhimpalas, Todi, Puriya, Hindol and*  
500 *Bhupali*). In our previous study we observed that *Bhimpalas raga* could effectively control  
501 DBP among prehypertensives, after 3 months of music intervention (41). Though we found  
502 noticeable reduction using single *raga Bhimpalas* music intervention, along with standard  
503 management protocols, there was not enough scientific evidence regarding the acute effect of  
504 the *raga* on normal healthy individuals, be it on BP or on other electrophysiological parameters.  
505 Therefore, in the current study, previously standardized melodic scale, *raga Bhimpalas*, was  
506 scientifically evaluated, for its acute effects.

507 Those in the intervention arm (group A), passively listened to *bansuri* (Indian flute)  
508 recording containing only *alaap* (a type of improvisation in Indian music) in *raga Bhimpalas*,  
509 against the drone instrument in the background, without percussion instruments, through  
510 headphones connected to a laptop for 10 min. The BP and HRV was digitally monitored thrice  
511 [pre, during and post – each condition lasting for 10 min]. Those in control arm (group B)

512 relaxed for 30 minutes, when the physiological parameters were recorded. To make the control  
513 group matched for the intervention and to avoid sleeping (and its effects), control arm received  
514 acoustic stimuli with natural sounds lasting for 10 seconds, played once in every 2 minutes,  
515 during intervention condition (mid 10 minutes).

516 *Main findings:*

517 *Before intervention:*

518 All sociodemographic and baseline parameters were comparable between the two  
519 groups, except DBP, which was higher in the control group prior to intervention. However, on  
520 regression analysis of all the probable confounding variables, none of the parameters seemed  
521 to affected the change in DBP that was observed.

522 *During intervention:*

523 The key findings in BP at 20<sup>th</sup> minute (during music) in group A were - SBP was similar  
524 to pre-intervention levels (indicating no effect /relaxation response), DBP increased  
525 significantly by 1.676 mm Hg, while HR insignificantly reduced. The various parasympathetic  
526 parameters of HRV [SDNN, RMSSD, VLF, HF (ms<sup>2</sup>)] reduced along with HR, TP (ms<sup>2</sup>) and  
527 LF (ms<sup>2</sup>). Mean NN interval increased, but not significantly. Thus a sympathetic predominance  
528 or reduction in parasympathetic activity was observed with music intervention. This might be  
529 due to the arousal effect of music as observed in few other studies (52–54).

530 In control group, SBP reduced very slightly, DBP increased, but was not significant,  
531 while HR continued to reduce throughout the 30 minutes' duration. Adding to this finding, in  
532 control group sustained and significant increase in mean NN interval, along with  
533 parasympathetic HRV parameters along with TP and LF (ms<sup>2</sup>) was observed along with  
534 reduction in HR, implying increased parasympathetic activity, when a person is relaxing  
535 completely for 30 minutes' duration, with larger amount of silence and natural sounds  
536 interspersing, for very short duration, in the mid 10 minutes (total 50 seconds). Nevertheless,  
537 the unit drop in HR was very less (hardly 1 beat per minute)

538 *After intervention:*

539 After the intervention was stopped, in group A, SBP, HR increased mildly. The DBP  
540 increase was significant on comparison to pre-intervention levels (increase by 1.824 mm Hg).  
541 All the HRV parameters increased towards pre-intervention levels with reduction in HR

542 (change being significant only for TP and LF). In the control group (group B), the SBP, DBP  
543 and HR reduced insignificantly after the intervention. Among the HRV parameters, mean NN  
544 interval, HR remained similar to during intervention levels. Other HRV parameters increased  
545 (change being significant for SDNN, TP and LF).

546 Note that LF power is produced by both SNS and PNS activity and is not a pure index  
547 of SNS drive. While SDNN, RMSSD, HF power is predominantly controlled by the PNS  
548 activity. Total power is said to reflect overall autonomic activity but has predominant vagal  
549 influence. (49).

#### 550 *Discussion of main findings:*

551 It can also be observed that passive listening task to *raga Bhimpalas* caused sympathetic  
552 arousal [as shown by increased DBP - indicating mild vasoconstriction in the periphery and  
553 drop in parasympathetic parameters of HRV – SDNN, RMSSD, HF (ms<sup>2</sup>)] during music, while  
554 regaining autonomic balance, after the music was stopped. This seems similar to the classic  
555 paper by Bernardi *et al*, where playing music for 2 minutes exhibited arousal response as  
556 against after stopping the music (32). Note that over ten minutes of music listening, the SBP  
557 did not change much, while HR reduced mildly, with increase in mean NN interval, though  
558 insignificant. The subjects involved in the current study were clinically normal, normotensives,  
559 (autonomically sound), and a large change in BP with music intervention, may be too high an  
560 expectation. In our previous study, music intervention caused a significant drop in DBP (~2  
561 mm Hg) among prehypertensives (41). In the current study, BP was measured acutely as  
562 subjects listened to music (in the lab) unlike in the previous study where BP was measured  
563 using 24 hour ambulatory BP device, prior to and after 3 months of intervention. Continuous  
564 BP monitoring, over 30 minutes, like ECG could have been better in indicating the real-time  
565 changes in BP. However, the observed significant DBP and HRV changes may be pointing  
566 towards the exciting / joyous emotion /arousal effect of *raga Bhimpalas*, as observed in the  
567 Indian Bollywood compositions based on this scale - *nainon mein badra chaaye* (movie: *mera*  
568 *saaya*), *E neele gagan ke tale* (movie: *Badshah*), *Kuch dil ne kaha* (movie: *Anupama*), *khilte*  
569 *hain gul yahan* (movie: *Sharmili*) (13).

570 This arousal response could be due to passive listening to an unfamiliar tune. Studies  
571 show that passive listening task produces a sympathetic response, when it is an emotionally  
572 arousing music (55). Similarly, in another study, authors interpreted that passive listening to  
573 positively valenced music increased HR, and listening to music in general was associated with

574 a mind wandering state (56). As opposed to current study findings, Weiss *et al.*, demonstrated  
575 greater pupil dilations (sympathetic arousal) during listening to familiar folk melody, compared  
576 to unfamiliar (novel) stimulus (57). Further in sports research, using music, it has been shown  
577 that unfamiliar relaxing music was the most relaxing (physiologically recorded using galvanic  
578 skin resistance, HR and peripheral temperature) and unfamiliar arousing music was the most  
579 arousing (58,59). A repeated exposure might have resulted in familiarity to the tune that was  
580 offered in this study and a different result. The probability of listening to music with an  
581 intention of relaxation, over a longer period of time, producing familiarity, under non-  
582 laboratory condition and thus a cumulative relaxation effect cannot be ruled out. To this  
583 thought, one study examined HRV among 13 students, after repetitive exposure to sedative  
584 music, excitatory music and no music condition. Each participant went through four sessions  
585 of one condition in a day. The LF and LF/HF ratio increased during sedative and excitatory  
586 music sessions but decreased during non-music conditions. The HF was higher during sedative  
587 music than during excitatory music listening but similar to non-music condition (60).

588 Non-expert listeners have a different physiological effect on listening to different  
589 genres of music (of different style and emotional outcome). In fifty untrained individuals,  
590 listening to atonal music was associated with a reduced HR and increased BP (SBP and DBP),  
591 possibly reflecting an increase in alertness and attention, psychological tension, and anxiety  
592 (61). Seventy percent of subjects in the current study were not trained in music. Further,  
593 regression analysis of the current study showed no effect of training on BP and HRV  
594 parameters.

595 The components in the music heard is also important to understand its physiological  
596 effect. Bowling *et al.*, observed that melodies that are positive / excitatory had more major  
597 intervals (>200 cents) while negative/ subdued ragas have more minor intervals (6). A recent  
598 study on emotions caused by *thaats* (scales with all 7 notes) of Hindustani music by varying  
599 the tones, and tempo of Hindustani music concluded that *ragas* with major intervals (*shuddh*  
600 *swaras - shuddh Re and shuddh Ga*) were rated as ‘calm’ while those with minor intervals  
601 (*komal swaras - komal re and komal dha*) were rated as ‘sad’ (22). *Bhimpalas raga* is a unique  
602 scale with 3 perfect notes and equal number of major and minor notes. This might explain the  
603 mild sympathetic effect seen in the current study.

604 The frequency which is usually used to tune musical instruments is about 440 Hz. A  
605 study noted that 432 Hz music was associated with an insignificant decrease of SBP and DBP,  
606 a significant decrease in HR, compared to 440 Hz and that the subjects were more focused and



607 more satisfied after they heard to music tuned at 432 Hz (62). In the present study music was  
608 played at Scale 'E' the frequency of which is 329.36 Hz – Note Sa (fundamental note).

609 The genre of music preferred by the subjects may be important as well. In the present  
610 study, experimenter chosen standardized music stimulus was used. Self-selected sedative  
611 music has been shown to induce both aroused and sedative emotions and a slight but significant  
612 increase in HR (63). In contrast another study, using sedative and stimulating music among  
613 cardiac rehabilitation patients, showed no effect of the type of music on BP (64). Music by  
614 Mozart, Strauss and the control group resulted in lower SBP, DBP; whereas listening to pop  
615 music (*ABBA*) caused no change. HR reduced significantly with Mozart music compared to  
616 control group. None of the above effects correlated with the music preference of the subjects  
617 (65).

618 In a crossover study of 40 min of active and passive intervention, active music therapy  
619 reduced LF/HF while passive music intervention (as seen in present study) increased LF/HF  
620 (25). Acute effect of different genres of music (heavy metal music, classical baroque music)  
621 on HRV parameters showed that listening to heavy metal music reduced SDNN significantly.  
622 LF ( $\text{ms}^2$  and nu) reduced with both types of music, while HF ( $\text{ms}^2$ ) reduced only with heavy  
623 metal music and LF/HF ratio reduced with classical baroque music. Authors thus concluded  
624 that heavy metal music decreased the autonomic modulation, while exposure to a classical  
625 baroque music reduced sympathetic regulation on the heart (66,67). When HRV was analysed  
626 during no sound condition RMSSD significantly increased, which authors attributed to the  
627 supine posture, when cardiac PNS inputs were maximal (68). In the current study protocol  
628 supine posture was followed for all participants, with the control group rested for complete 30  
629 minutes, without any disturbance, while music intervention group, rested with music being  
630 played in the middle 10 minutes. Music chosen was not guided with breathing frequency,  
631 though the respiratory rate was recorded. Music combined with guided breathing exercises  
632 have shown better control of physiological parameters in a few studies (69,70). Nevertheless,  
633 recently a study concluded that both listening to music and deep breathing exercise were  
634 associated with a clinically significant reduction in SBP and DBP and that deep breathing  
635 exercise did not augment the benefit of music in reducing BP (71). A review based on the effect  
636 of auditory stimulation and cardiac autonomic regulation hypothesized that dopamine release  
637 in the striatal system, that is induced by pleasurable songs was involved in cardiac autonomic  
638 regulation (72).

639 The strengths of the study are that, to the best of our knowledge, for the first time an  
640 Indian melodic scale has been studied systematically and scientifically, via a randomized trial

641 (avoiding different types of bias), among normal healthy individuals, with recording of various  
642 physiological parameters. All parameters were free from measurement errors as the recordings  
643 were performed by a single, well trained, but blinded, research assistant (reducing observer's  
644 error) along with validation from the PI (who was also blinded) for accuracy of the data  
645 collected. Further the devices used to collect the data was standard, reliable and well validated,  
646 through prior research studies. The chosen music intervention was standardized and was based  
647 on existing music literatures. Music used was composed of pure *alaap* and drone instrument.  
648 Percussion instruments and lyrical component was avoided, as they have their own respective  
649 effects on physiological parameters. Passive listening to music was chosen to maintain  
650 uniformity, as active music making may not be an option for all subjects. The control group  
651 was well matched and the intervention received by the control group was also standardized.  
652 The sample size was calculated based on prior research work, with appropriate power and was  
653 adequate to show measurable, significant effects of the intervention. Subjects of both genders,  
654 with homogenous age groups were compared. Thus the evidence obtained through this work is  
655 true and scientifically authentic.

656         The limitations of the study were that choice of music was not given to the subjects.  
657 Literature review shows music has better effect, especially with respect to pain, when self-  
658 chosen (73–77). However there have been quite a number of other research works that prove  
659 that experimenter chosen music is better than self-chosen music (13) and a few others showing  
660 that choice of music did not matter (78). One fact of this study was that the participants knew  
661 the aim of the study, and might have listened to the music with a particular intention, that is  
662 different from that of control group, as once the intervention started, control group knew they  
663 were not in the music intervention group. This limitation was difficult to overcome, as research  
664 question demanded this design and the results obtained may be interpreted with this  
665 background. A subject's involvement in the music and subjective emotions were not captured.  
666 Self-reported parameters are however less reliable than actual physiological recordings.  
667 Though all subjects were clinically normal, laboratory measurements of their blood/serum or  
668 urine was not conducted to conclusively say that everyone was normal. Further extraction of  
669 the musical components through pre-determined software, and its correlation with the  
670 continuous monitoring of BP and HRV may further elaborate on the cause-effect response seen.

## 671 **Conclusion**

672 For the first time, through this study we have shown the acute effect of Indian music on  
673 cardiovascular electrophysiological parameters, in a systematic fashion. Passive listening to a  
674 north Indian Hindustani classical musical scale, *raga bhimpalas* caused mild arousal response  
675 during intervention, that trended to return to baseline levels after the intervention was stopped.  
676 This may be attributed to a combination of major and minor intervals in the scale as well as a  
677 normal response to an unfamiliar stimulus, that was heard with enough attention so as to  
678 produce a mild sympathetic arousal. Future studies should try to evaluate the physiological  
679 responses during passive listening to different genres, scales of music, and the musical, after  
680 familiarizing to the stimuli.

#### 681 **Credit roles:**

682 Conceptualization, Funding acquisition – UKK; Data curation – UKK, VJ, Formal analysis –  
683 UKK, RK, NSM; Investigation – UKK, VJ; Methodology – UKK, VJ, GJ; Project  
684 administration – UKK, VJ, GJ, NSM, RK; Resources – UKK, VJ; Software – UKK, RK, NSM;  
685 Supervision – UKK, VJ, GJ, VSP; Validation – RK, NSM; Writing original draft – UKK, GJ;  
686 Review & editing – VJ, RK, NSM, VSP.

#### 687 **Acknowledgement**

688 Authors acknowledge funding agencies, administrative support received at Ramaiah Medical  
689 college, Bangalore. We acknowledge the exclusive recording shared by *Vidhwan Pandit Pravin*  
690 *Godhkhindi*, an eminent flautist, for this study.

#### 691 **Competing interests**

692 Authors declare no conflicts of interest.

#### 693 **Funding**

694 The above project was funded by Rajiv Gandhi University of Health Sciences (RGUHS),  
695 Government of Karnataka, India (Project Unique ID: 15M009) and Indian council for Medical  
696 research (ICMR) (2017-0174/F1).

#### 697 **References:**

- 698 1. Thompson WF, Schellenberg U. Listening to music. *MENC Handb Music Cogn Dev.*  
699 2006;72–123.

- 700 2. Zatorre RJ, Salimpoor VN. From perception to pleasure: Music and its neural substrates.  
701 Proc Natl Acad Sci. 2013 Jun 18;110(Supplement 2):10430–7.
- 702 3. Kaufmann W. Rasa, Rāga-Mālā and Performance Times in North Indian Rāgas.  
703 Ethnomusicology. 1965;9(3):272–91.
- 704 4. Multicultural Music Therapy: The World Music Connection | Journal of Music Therapy |  
705 Oxford Academic [Internet]. [cited 2020 Apr 29]. Available from:  
706 <https://academic.oup.com/jmt/article-abstract/25/1/17/1026880?redirectedFrom=fulltext>
- 707 5. Menuhin Y, Davis C. The music of man. Methuen; 1979.
- 708 6. Bowling DL, Sundararajan J, Han S, Purves D. Expression of Emotion in Eastern and  
709 Western Music Mirrors Vocalization. PLoS ONE [Internet]. 2012 Mar 14 [cited 2020 Apr  
710 30];7(3). Available from: <https://www.ncbi.nlm.nih.gov/pmc/articles/PMC3303771/>
- 711 7. Svara. In: Wikipedia [Internet]. 2020 [cited 2020 Apr 30]. Available from:  
712 <https://en.wikipedia.org/w/index.php?title=Svara&oldid=948781017>
- 713 8. Music of India – a brief outline – Part Four [Internet]. sreenivasarao’s blogs. 2015 [cited  
714 2020 May 2]. Available from: <https://sreenivasaraos.com/2015/04/22/music-of-india-a-brief-outline-part-four/>
- 716 9. Hindustani S@ R. Improvisation in Indian classical music [Internet]. Medium. 2020 [cited  
717 2020 May 2]. Available from: <https://medium.com/@raaghindustani/improvisation-in-indian-classical-music-f15c48bca25>
- 719 10. Improvisation in Carnatic Music [Internet]. [cited 2020 May 2]. Available from:  
720 <http://www.carnaticcorner.com/articles/improvisation.html>
- 721 11. McNeil A. Seed ideas and creativity in Hindustani raga music: beyond the composition–  
722 improvisation dialectic. Ethnomusicol Forum. 2017 Jan 2;26(1):116–32.
- 723 12. Mojtabavi H, Saghazadeh A, Valenti VE, Rezaei N. Can music influence cardiac  
724 autonomic system? A systematic review and narrative synthesis to evaluate its impact on  
725 heart rate variability. Complement Ther Clin Pract. 2020 May;39:101162.

- 726 13. Pelletier CL. The effect of music on decreasing arousal due to stress: a meta-analysis. *J*  
727 *Music Ther.* 2004;41(3):192–214.
- 728 14. Lee KS, Jeong HC, Yim JE, Jeon MY. Effects of Music Therapy on the Cardiovascular  
729 and Autonomic Nervous System in Stress-Induced University Students: A Randomized  
730 Controlled Trial. *J Altern Complement Med N Y N.* 2016 Jan;22(1):59–65.
- 731 15. Kunikullaya KU, Goturu J, Muradi V, Hukkeri PA, Kunnivil R, Doreswamy V, et al.  
732 Music versus lifestyle on the autonomic nervous system of prehypertensives and  
733 hypertensives—a randomized control trial. *Complement Ther Med.* 2015 Oct  
734 1;23(5):733–40.
- 735 16. Bernardi L, Porta C, Casucci G, Balsamo R, Bernardi NF, Fogari R, et al. Dynamic  
736 interactions between musical, cardiovascular, and cerebral rhythms in humans.  
737 *Circulation.* 2009 Jun 30;119(25):3171–80.
- 738 17. al CS et. Music can facilitate blood pressure recovery from stress. - PubMed - NCBI  
739 [Internet]. [cited 2019 Apr 17]. Available from:  
740 <https://www.ncbi.nlm.nih.gov/pubmed/15296685>
- 741 18. Balkwill L-L, Thompson WF. A Cross-Cultural Investigation of the Perception of  
742 Emotion in Music: Psychophysical and Cultural Cues. *Music Percept Interdiscip J.* 1999  
743 Oct 1;17(1):43–64.
- 744 19. Chordia P, Godfrey M, Rae A. EXTENDING CONTENT-BASED  
745 RECOMMENDATION: THE CASE OF INDIAN CLASSICAL MUSIC. 2008;7.
- 746 20. Wieczorkowska AA, Datta AK, Sengupta R, Dey N, Mukherjee B. On Search for  
747 Emotion in Hindusthani Vocal Music. In: Raś ZW, Wieczorkowska AA, editors.  
748 *Advances in Music Information Retrieval* [Internet]. Berlin, Heidelberg: Springer; 2010  
749 [cited 2020 Apr 29]. p. 285–304. (Studies in Computational Intelligence). Available from:  
750 [https://doi.org/10.1007/978-3-642-11674-2\\_13](https://doi.org/10.1007/978-3-642-11674-2_13)
- 751 21. McNeil A. Ragas, Recipes, and Rasas [Internet]. *Oxford Handbooks Online.* 2015 [cited  
752 2020 Apr 29]. Available from:  
753 [https://www.oxfordhandbooks.com/view/10.1093/oxfordhb/9780199935321.001.0001/o](https://www.oxfordhandbooks.com/view/10.1093/oxfordhb/9780199935321.001.0001/oxfordhb-9780199935321-e-43)  
754 [xfordhb-9780199935321-e-43](https://www.oxfordhandbooks.com/view/10.1093/oxfordhb/9780199935321.001.0001/oxfordhb-9780199935321-e-43)

- 755 22. Mathur A, Vijayakumar SH, Chakrabarti B, Singh NC. Emotional responses to  
756 Hindustani raga music: the role of musical structure. *Front Psychol.* 2015;6:513.
- 757 23. Lynar E, Cvejic E, Schubert E, Vollmer-Conna U. The joy of heartfelt music: An  
758 examination of emotional and physiological responses. *Int J Psychophysiol Off J Int*  
759 *Organ Psychophysiol.* 2017;120:118–25.
- 760 24. Phipps MA, Carroll DL, Tsiantoulas A. Music as a therapeutic intervention on an  
761 inpatient neuroscience unit. *Complement Ther Clin Pract.* 2010 Aug;16(3):138–42.
- 762 25. McPherson T, Berger D, Alagapan S, Fröhlich F. Active and Passive Rhythmic Music  
763 Therapy Interventions Differentially Modulate Sympathetic Autonomic Nervous System  
764 Activity. *J Music Ther.* 2019 Jun 8;
- 765 26. Hyde IH, Scalapino W. The influence of music upon electrocardiograms and blood  
766 pressure. *Am J Physiol-Leg Content.* 1918 Apr 1;46(1):35–8.
- 767 27. Bernardi L, Sleight P, Bandinelli G, Cencetti S, Fattorini L, Wdowczyk-Szulc J, et al.  
768 Effect of rosary prayer and yoga mantras on autonomic cardiovascular rhythms:  
769 comparative study. *BMJ.* 2001 Dec 22;323(7327):1446–9.
- 770 28. Cysarz D, von Bonin D, Lackner H, Heusser P, Moser M, Bettermann H. Oscillations of  
771 heart rate and respiration synchronize during poetry recitation. *Am J Physiol Heart Circ*  
772 *Physiol.* 2004 Aug;287(2):H579-587.
- 773 29. Berbel P, Moix J, Quintana S. [Music versus diazepam to reduce preoperative anxiety: a  
774 randomized controlled clinical trial]. *Rev Esp Anesthesiol Reanim.* 2007 Jul;54(6):355–8.
- 775 30. Smolen D, Topp R, Singer L. The effect of self-selected music during colonoscopy on  
776 anxiety, heart rate, and blood pressure. *Appl Nurs Res ANR.* 2002 Aug;15(3):126–36.
- 777 31. Hamel WJ. The effects of music intervention on anxiety in the patient waiting for cardiac  
778 catheterization. *Intensive Crit Care Nurs.* 2001 Oct;17(5):279–85.
- 779 32. Bernardi L, Porta C, Sleight P. Cardiovascular, cerebrovascular, and respiratory changes  
780 induced by different types of music in musicians and non-musicians: the importance of  
781 silence. *Heart Br Card Soc.* 2006 Apr;92(4):445–52.

- 782 33. Larsen PD, Galletly DC. The sound of silence is music to the heart. *Heart Br Card Soc.*  
783 2006 Apr;92(4):433–4.
- 784 34. Okada K, Kurita A, Takase B, Otsuka T, Kodani E, Kusama Y, et al. Effects of music  
785 therapy on autonomic nervous system activity, incidence of heart failure events, and  
786 plasma cytokine and catecholamine levels in elderly patients with cerebrovascular disease  
787 and dementia. *Int Heart J.* 2009 Jan;50(1):95–110.
- 788 35. Cockerton T, Moore S, Norman D. Cognitive test performance and background music.  
789 *Percept Mot Skills.* 1997 Dec;85(3 Pt 2):1435–8.
- 790 36. Yamamoto T, Ohkuwa T, Itoh H, Kitoh M, Terasawa J, Tsuda T, et al. Effects of pre-  
791 exercise listening to slow and fast rhythm music on supramaximal cycle performance and  
792 selected metabolic variables. *Arch Physiol Biochem.* 2003 Jul;111(3):211–4.
- 793 37. Urakawa K, Yokoyama K. Music can enhance exercise-induced sympathetic dominance  
794 assessed by heart rate variability. *Tohoku J Exp Med.* 2005 Jul;206(3):213–8.
- 795 38. Sudheesh NN, Joseph KP. Investigation into the effects of music and meditation on  
796 galvanic skin response. *ITBM-RBM.* 2000 Jun 1;21(3):158–63.
- 797 39. Dey A, Bhattacharya DK, Tibarewala DN, Palit SK. Effect of music on autonomic  
798 nervous system through the study of symbolic dynamics of heart rate variability signals.  
799 In 2013 [cited 2019 Jan 30]. p. 120–4. Available from:  
800 <http://journals.theired.org/journals/paper/details/1649.html>
- 801 40. Maharishi Ayurveda | The Health Benefits of Different Ragas [Internet]. [cited 2018 Jun  
802 13]. Available from: <https://www.maharishi.co.uk/the-health-benefits-of-different-ragas>
- 803 41. Kunikullaya KU, Goturu J, Muradi V, Hukkeri PA, Kunnivil R, Doreswamy V, et al.  
804 Combination of music with lifestyle modification versus lifestyle modification alone on  
805 blood pressure reduction - A randomized controlled trial. *Complement Ther Clin Pract.*  
806 2016 May;23:102–9.
- 807 42. Molarius A, Kuulasmaa K, Sans S. Quality Assessment of Weight and Height  
808 Measurements in the WHO MONICA Project [Internet]. National Institute for Health and  
809 Welfare, Finland, on behalf of the World Health Organization and the WHO MONICA

- 810 Project investigators; 1999 [cited 2020 May 2]. Available from:  
811 <https://www.thl.fi/publications/monica/bmi/bmiqa20.htm>
- 812 43. Cardona-Müller D, Grover-Páez F, Guzmán-Saldivar V, Alanis-Sánchez GA, Murguía-  
813 Soto C, Totsuka-Sutto SE, et al. [Reliability of an automatic monitor for blood pressure  
814 measurement]. *Rev Med Chil.* 2018 Feb;146(2):190–5.
- 815 44. Idrobo-Ávila EH, Loaiza-Correa H, van Noorden L, Muñoz-Bolaños FG, Vargas-Cañas  
816 R. Different Types of Sounds and Their Relationship With the Electrocardiographic  
817 Signals and the Cardiovascular System - Review. *Front Physiol.* 2018;9:525.
- 818 45. Hindi film songs based on raga Bhimpalasi | My Views On Bollywood [Internet]. [cited  
819 2018 Jun 13]. Available from: [https://myviewsonbollywood.wordpress.com/tag/hindi-](https://myviewsonbollywood.wordpress.com/tag/hindi-film-songs-based-on-raga-bhimpalasi/)  
820 [film-songs-based-on-raga-bhimpalasi/](https://myviewsonbollywood.wordpress.com/tag/hindi-film-songs-based-on-raga-bhimpalasi/)
- 821 46. Bhimpalasi. In: Wikipedia [Internet]. 2020 [cited 2020 Apr 30]. Available from:  
822 <https://en.wikipedia.org/w/index.php?title=Bhimpalasi&oldid=951507010>
- 823 47. Choi A, Shin H. Quantitative Analysis of the Effect of an Ectopic Beat on the Heart Rate  
824 Variability in the Resting Condition. *Front Physiol.* 2018;9:922–922.
- 825 48. Peltola MA. Role of Editing of R–R Intervals in the Analysis of Heart Rate Variability.  
826 *Front Physiol* [Internet]. 2012 May 23 [cited 2019 Mar 12];3. Available from:  
827 <https://www.ncbi.nlm.nih.gov/pmc/articles/PMC3358711/>
- 828 49. Shaffer F, Ginsberg JP. An Overview of Heart Rate Variability Metrics and Norms. *Front*  
829 *Public Health* [Internet]. 2017 Sep 28 [cited 2019 Mar 12];5. Available from:  
830 <http://journal.frontiersin.org/article/10.3389/fpubh.2017.00258/full>
- 831 50. Brennan M, Palaniswami M, Kamen P. Poincaré plot interpretation using a physiological  
832 model of HRV based on a network of oscillators. *Am J Physiol-Heart Circ Physiol.* 2002  
833 Nov 1;283(5):H1873–86.
- 834 51. Park SK, Kang SJ, Im HS, Cheon MY, Bang JY, Shin WJ, et al. Validity of Heart Rate  
835 Variability Using Poincare Plot for Assessing Vagal Tone during General Anesthesia.  
836 *Korean J Anesthesiol.* 49(6):765–70.



- 837 52. Kelley E, Andrick G, Benzenbower F, Devia M. Physiological arousal response to  
838 differing musical genres. :13.
- 839 53. The effect of music on arousal, enjoyment, and cognitive performance - Hayoung A. Lim,  
840 Heekyeong Park, 2019 [Internet]. [cited 2019 Jul 4]. Available from:  
841 <https://journals.sagepub.com/doi/abs/10.1177/0305735618766707>
- 842 54. Salimpoor VN, Benovoy M, Longo G, Cooperstock JR, Zatorre RJ. The Rewarding  
843 Aspects of Music Listening Are Related to Degree of Emotional Arousal. PLoS ONE  
844 [Internet]. 2009 Oct 16 [cited 2019 Jul 4];4(10). Available from:  
845 <https://www.ncbi.nlm.nih.gov/pmc/articles/PMC2759002/>
- 846 55. Koelsch S. Music-syntactic processing and auditory memory: similarities and differences  
847 between ERAN and MMN. *Psychophysiology*. 2009 Jan;46(1):179–90.
- 848 56. Markovic A, Kühnis J, Jäncke L. Task Context Influences Brain Activation during Music  
849 Listening. *Front Hum Neurosci* [Internet]. 2017 Jun 29 [cited 2019 Dec 25];11. Available  
850 from: <https://www.ncbi.nlm.nih.gov/pmc/articles/PMC5489556/>
- 851 57. Weiss MW, Trehub SE, Schellenberg EG, Habashi P. Pupils dilate for vocal or familiar  
852 music. *J Exp Psychol Hum Percept Perform*. 2016;42(8):1061–5.
- 853 58. Kuan G, Morris T, Terry P. Effects of music on arousal during imagery in elite shooters:  
854 A pilot study. *PLoS ONE* [Internet]. 2017 Apr 17 [cited 2020 Apr 30];12(4). Available  
855 from: <https://www.ncbi.nlm.nih.gov/pmc/articles/PMC5393549/>
- 856 59. Kuan G, Morris T, Kueh YC, Terry PC. Effects of Relaxing and Arousing Music during  
857 Imagery Training on Dart-Throwing Performance, Physiological Arousal Indices, and  
858 Competitive State Anxiety. *Front Psychol* [Internet]. 2018 [cited 2020 Apr 30];9.  
859 Available from: <https://www.frontiersin.org/articles/10.3389/fpsyg.2018.00014/full>
- 860 60. Iwanaga M, Kobayashi A, Kawasaki C. Heart rate variability with repetitive exposure to  
861 music. *Biol Psychol*. 2005 Sep;70(1):61–6.
- 862 61. Proverbio AM, Manfrin L, Arcari LA, De Benedetto F, Gazzola M, Guardamagna M, et  
863 al. Non-expert listeners show decreased heart rate and increased blood pressure (fear  
864 bradycardia) in response to atonal music. *Front Psychol*. 2015;6:1646.

- 865 62. Calamassi D, Pomponi GP. Music Tuned to 440 Hz Versus 432 Hz and The Health  
866 Effects: A Double-blind Cross-over Pilot Study. *Explore N Y N*. 2019 Apr 6;
- 867 63. Lingham J, Theorell T. Self-selected “favourite” stimulative and sedative music listening  
868 – how does familiar and preferred music listening affect the body? *Nord J Music Ther*.  
869 2009 Sep 1;18(2):150–66.
- 870 64. Miller JS, Terbizan DJ. Clinical Outcomes of Different Tempos of Music During Exercise  
871 in Cardiac Rehabilitation Patients. *Int J Exerc Sci*. 2017;10(5):681–9.
- 872 65. Trappe H-J, Voit G. The Cardiovascular Effect of Musical Genres. *Dtsch Arzteblatt Int*.  
873 2016 May 20;113(20):347–52.
- 874 66. da Silva SAF, Guida HL, Dos Santos Antonio AM, de Abreu LC, Monteiro CBM, Ferreira  
875 C, et al. Acute auditory stimulation with different styles of music influences cardiac  
876 autonomic regulation in men. *Int Cardiovasc Res J*. 2014 Sep;8(3):105–10.
- 877 67. Vanderlei FM, de Abreu LC, Garner DM, Valenti VE. Symbolic Analysis of Heart Rate  
878 Variability During Exposure to Musical Auditory Stimulation. *Altern Ther Health Med*.  
879 2016 Apr;22(2):24–31.
- 880 68. Veternik M, Tonhajzerova I, Misek J, Jakusova V, Hudeckova H, Jakus J. The Impact of  
881 Sound Exposure on Heart Rate Variability in Adolescent Students. *Physiol Res*. 2018 Oct  
882 31;695–702.
- 883 69. Schein MH, Gavish B, Herz M, Rosner-Kahana D, Naveh P, Knishkowsky B, et al. Treating  
884 hypertension with a device that slows and regularises breathing: a randomised, double-  
885 blind controlled study. *J Hum Hypertens*. 2001 Apr;15(4):271–8.
- 886 70. Herakova N, Nwobodo NHN, Wang Y, Chen F, Zheng D. Effect of respiratory pattern on  
887 automated clinical blood pressure measurement: an observational study with  
888 normotensive subjects. *Clin Hypertens*. 2017;23:15.
- 889 71. Kow FP, Adlina B, Sivasangari S, Punithavathi N, Ng KK, Ang AH, et al. The impact of  
890 music guided deep breathing exercise on blood pressure control - A participant blinded  
891 randomised controlled study. *Med J Malaysia*. 2018 Aug;73(4):233–8.

- 892 72. Valenti VE, Guida HL, Frizzo ACF, Cardoso ACV, Vanderlei LCM, de Abreu LC.  
893 Auditory stimulation and cardiac autonomic regulation. *Clinics*. 2012 Aug;67(8):955–8.
- 894 73. Villarreal EAG, Brattico E, Vase L, Østergaard L, Vuust P. Superior analgesic effect of  
895 an active distraction versus pleasant unfamiliar sounds and music: the influence of  
896 emotion and cognitive style. *PloS One*. 2012;7(1):e29397.
- 897 74. Roy M, Peretz I, Rainville P. Emotional valence contributes to music-induced analgesia.  
898 *Pain*. 2008 Jan;134(1–2):140–7.
- 899 75. Mitchell LA, MacDonald RAR, Brodie EE. A comparison of the effects of preferred  
900 music, arithmetic and humour on cold pressor pain. *Eur J Pain Lond Engl*. 2006  
901 May;10(4):343–51.
- 902 76. Huang S-T, Good M, Zauszniewski JA. The effectiveness of music in relieving pain in  
903 cancer patients: a randomized controlled trial. *Int J Nurs Stud*. 2010 Nov;47(11):1354–  
904 62.
- 905 77. Parente JA. Music preference as a factor of music distraction. *Percept Mot Skills*. 1976  
906 Aug;43(1):337–8.
- 907 78. Thaut MH, Davis WB. The Influence of Subject-Selected versus Experimenter-Chosen  
908 Music on Affect, Anxiety, and Relaxation. *J Music Ther*. 1993 Dec 1;30(4):210–23.

909

\*\*\*\*\*
